# Supplementary material for: Delineating family needs in the transition from hospital to home for children with medical complexity: part 1, a meta-aggregation of qualitative studies
Source: Springer Nature journal article supplement (doi:10.1186/s13023-023-02942-9), 2023-12-12
Supplement: MOESM2 [file 26519644]

**Table 1. List of included studies and demographics of infants and parents**

| First author    | Year | Infant demographic |              |                                                            | Medical condition*                                                                                                                                                                                                                                                                                                                                                                                                                                                                                                                                                   | Medical technology*                                                                                                                                                             | Time in hospital prior to discharge | Moment(s) of data collection             | Parents demographic |            |                                           | Other specifics                 |                                                                                                              |                                                      |
|-----------------|------|--------------------|--------------|------------------------------------------------------------|----------------------------------------------------------------------------------------------------------------------------------------------------------------------------------------------------------------------------------------------------------------------------------------------------------------------------------------------------------------------------------------------------------------------------------------------------------------------------------------------------------------------------------------------------------------------|---------------------------------------------------------------------------------------------------------------------------------------------------------------------------------|-------------------------------------|------------------------------------------|---------------------|------------|-------------------------------------------|---------------------------------|--------------------------------------------------------------------------------------------------------------|------------------------------------------------------|
|                 |      | Infants n          | Female n (%) | Age at discharge Range in mo (n), Md/Mn, SD (if available) |                                                                                                                                                                                                                                                                                                                                                                                                                                                                                                                                                                      |                                                                                                                                                                                 |                                     |                                          | Diagnosis (n)       | Device (n) | Range (n), MD/Mn, SD (if available)       |                                 | Weeks (unless specified otherwise) after discharge                                                           | Interviewed Parents n                                |
| Aasen           | 2018 | 9                  | N/A          | 0-17 (9)                                                   | Ca (2), synd (2), Various infections (5)                                                                                                                                                                                                                                                                                                                                                                                                                                                                                                                             | N/A                                                                                                                                                                             | N/A                                 | N/A                                      | 9                   | 6 (67)     | 39                                        | N/A                             | Hospital at home (HAH); hospital services at home                                                            |                                                      |
| Barone          | 2020 | 8 <sup>a</sup>     | N/A          | 0-6 (8)                                                    | PREM and/or complications related to PREM (5), specific syndrome (3)                                                                                                                                                                                                                                                                                                                                                                                                                                                                                                 | CVL (1); g tube (6); LFNC (3), CR monitor (n=1), Subgaleal shunt (1), O2 (4), Glucometer (1)                                                                                    | NICU for >28d or PICU for >14d (8)  | 1mo                                      | N/A                 | N/A        | <25 (1), 25-35 (6)                        | 1 (14)                          |                                                                                                              |                                                      |
| Berman          | 2018 | 18 <sup>b</sup>    | 5 (28)       | N/A                                                        | N/A                                                                                                                                                                                                                                                                                                                                                                                                                                                                                                                                                                  | NG-tube (10), POX (2), O2 (1) or Sa (1) monitor, G-tube (1), G-tube (3), feeding pump (1), suction device (2), Kangaroo (1), O2 (4), Trach (2), Vent (1), NEB (1), VP shunt (1) | N/A                                 | N/A <sup>ii</sup>                        | 15                  | 14 (93)    | 22-29 (6), 30-40 (6), 40-47 (3) (1 = N/A) | 2 (13)                          | NICU hospitalization                                                                                         |                                                      |
| Brenner         | 2015 | 15                 | 7 (47)       | 1-11 (7), Mn 5.7, 2.96 SD                                  | N/A                                                                                                                                                                                                                                                                                                                                                                                                                                                                                                                                                                  | Trach (15), Ventilator (2), CPAP (13)                                                                                                                                           | 3-22mo (15), Mn 8.7mo, 6.36 SD      | <5 y                                     | 15                  | 12 (80)    | N/A                                       | N/A                             | Most children (n=13) were discharged to home with a homecare package                                         |                                                      |
| Callans         | 2016 | N/A                | N/A          | N/A                                                        | Compromised airway                                                                                                                                                                                                                                                                                                                                                                                                                                                                                                                                                   | Trach (N/A)                                                                                                                                                                     | N/A                                 | N/A                                      | 18                  | 16 (89)    | N/A                                       | N/A                             |                                                                                                              |                                                      |
| Coelho Ramos    | 2015 | N/A                | N/A          | 35-108 (N/A)                                               | congenital causes (8), acquired causes (2)                                                                                                                                                                                                                                                                                                                                                                                                                                                                                                                           | N/A                                                                                                                                                                             | N/A                                 | N/A                                      | 10                  | 10 (100)   | N/A                                       | N/A                             |                                                                                                              |                                                      |
| Cohen           | 1999 | 5 <sup>c</sup>     | N/A          | <204 (5)                                                   | N/A                                                                                                                                                                                                                                                                                                                                                                                                                                                                                                                                                                  | Ventilator support (5)                                                                                                                                                          | 17 mo (1)                           | 48-72h, 3mo, 7mo, 12mo <sup>d</sup>      | N/A                 | N/A        | N/A                                       | N/A                             | Families from socially marginalized groups (n=3)                                                             |                                                      |
| Desal           | 2015 | 18                 | 7 (39)       | 0-23 (2), 24-48 (6), 60-144 (6), 156-216 (4)               | No chronic conditions (6), Non-complex chronic conditions (3), Medical complexity (9) <sup>e</sup>                                                                                                                                                                                                                                                                                                                                                                                                                                                                   | G-tube (1 or more) < 3d (16), > 3d (2)                                                                                                                                          |                                     | < 3mo                                    | 18                  | 17 (94)    | 18-24 (2), 25-34 (4), 35-44 (7), >45 (5)  | 4 (22)                          |                                                                                                              |                                                      |
| Fairless        | 2021 | 8 <sup>a</sup>     | N/A          | 43w GA (38-48w)                                            | Born prematurely <34w GA, discharged with >1 medical condition, >1 medication and medical equipment at home (not specified per child)                                                                                                                                                                                                                                                                                                                                                                                                                                | N/A                                                                                                                                                                             | N/A                                 | < 3y                                     | 6                   | 6 (100)    | >18y                                      | N/A                             |                                                                                                              |                                                      |
| Gaskin          | 2018 | 12                 | 7 (58)       | 0-1 (7)                                                    | HLHS (10), HRHS (1), TOF (1), Noncardiac defects (5), Genetic abnormality (3)                                                                                                                                                                                                                                                                                                                                                                                                                                                                                        | Mechanical ventilation (6) (pre-operative management)                                                                                                                           | N/A                                 | N/A                                      | 2, 8 <sup>e</sup>   | 16         | 12 (75)                                   | 20-25 (3), 26-30 (4), 31-40 (5) | 4 (33)                                                                                                       | Children underwent stage 1 treatment for complex CHD |
| Gaskin          | 2021 | 12                 | 7 (58)       | 0-1 (7)                                                    | HLHS (10), HRHS (1), TOF (1), Noncardiac defects (5), Genetic abnormality (3)                                                                                                                                                                                                                                                                                                                                                                                                                                                                                        | N/A                                                                                                                                                                             | N/A                                 | N/A                                      | 2, 8 <sup>e</sup>   | 16         | 12 (75)                                   | 20-25 (3), 26-30 (4), 31-40 (5) | 4 (33)                                                                                                       | Children underwent stage 1 treatment for complex CHD |
| Hebballi        | 2021 | 16                 | N/A          | N/A                                                        | Former NICU patients with an extended NICU stay, having complex medical conditions                                                                                                                                                                                                                                                                                                                                                                                                                                                                                   | N/A                                                                                                                                                                             | N/A                                 | Once after discharge, not specified when | 16                  | 15 (94)    | N/A                                       | N/A                             | Combination of focus groups and individual interviews                                                        |                                                      |
| Lakshmanan      | 2019 | 21                 | N/A          | 6-12 (21)                                                  | Imp. anus (1), Torticollis (3), CP (1), DD (11), CM of Optic nerve (1), EP (1), HP (1), MEG (1), Disorder of psychological development (1), CVI (1), ET (1), Optic atrophy (1), BPD (4), Anoxic brain damage (1), Language DD (3), Plagiocephaly (1), EA (2), VACTERL (2), Cleft palate/lip (1), Multiple congenital anomalies (1), OSA (2), Other congenital malformations of abdominal wall (1), Other reduction abnormalities of brain (1), RD (1), VUR (1), PH (1), IPD (1), SNHL (1), MD (1), Absence of rectum (1), HT (1), Mediastinitis (1), COA (1), RA (1) | Medical equipment (10), O2 (5), G-tube (7), Trach or ventilator dependence (1), VP shunt (1)                                                                                    | 31-135d (21), Md 83d                | N/A                                      | 21                  | 20 (95)    | Md 26, IQR 23-27                          | N/A                             | Living in a neighborhood with 3-4th quartile economic hardship (n=13)                                        |                                                      |
| Leary           | 2020 | 20                 | 12 (60)      | 0-180 (20)                                                 | Neur (7), CV (3), GI (3), HEME (3), Malignancy (2), RES (1), Metabolic (1) complex chronic condition                                                                                                                                                                                                                                                                                                                                                                                                                                                                 | N/A                                                                                                                                                                             | N/A                                 | 5d                                       | N/A                 | N/A        | N/A                                       | N/A                             | Data collected at readmission                                                                                |                                                      |
| Lerret          | 2017 | 48                 | 24 (50)      | 0-210 (48), Md 33.6                                        | Liver (20), heart (15), kidney (8), multivisceral (5), lung (1) transplant                                                                                                                                                                                                                                                                                                                                                                                                                                                                                           | Enteral/tube feeding (17), CVL (14), Drainage tube (3)                                                                                                                          | 4-90d (48), Mn 13.5d                | 3w, 3mo, 6mo                             | 48                  | 41 (85)    | 19-55 (48), Md 34                         | N/A                             |                                                                                                              |                                                      |
| Leyenaar        | 2017 | 23                 | 10 (44)      | 1-14 (23), Md 5.5                                          | CA or noncancer multisystem disease (23)                                                                                                                                                                                                                                                                                                                                                                                                                                                                                                                             | g-tube, j-tube, CVL, VP shunt, ostomies, or dialysis (15)                                                                                                                       | N/A                                 | N/A                                      | N/A <sup>i</sup>    | 23         | 19 (83)                                   | 33-45 (23), Md 38               | 3 (14)                                                                                                       |                                                      |
| Manhas          | 2012 | 2                  | 2 (100)      | <60 (2)                                                    | N/A                                                                                                                                                                                                                                                                                                                                                                                                                                                                                                                                                                  | Ventilator support (2)                                                                                                                                                          | N/A                                 | N/A                                      | 2                   | 2 (100)    | N/A                                       | N/A                             | Receiving provincially funded home-care services                                                             |                                                      |
| Margolan        | 2004 | 15                 | N/A          | 36-228 (15)                                                | CH (1), muscular dystrophy with hypomyelination (1), Congenital myopathy (1), SMA (3), PRS (1), Lung disease (1), Severe sco (1), TM (1), BM (1), Midline defects (1), Congenital hypoventilation syndrome (2), Acquired hypoventilation (11), DAA resulting in TM (1), DH (1), Spinal injury (1), CMG (1), EP (1)                                                                                                                                                                                                                                                   | Ventilator support (>3mo (15), NEB (2), G-tube (6), NG-tube (1)                                                                                                                 | Mn 513d                             | N/A                                      | 16 <sup>o</sup>     | 13 (81)    | N/A                                       | N/A                             | Home care support (n=13)                                                                                     |                                                      |
| Murdoch         | 2011 | 10 <sup>o</sup>    | 4 (40)       | 0 <sup>f</sup>                                             | PREM (8), CLD (4), PDA (4), RDS (2), Hirschprung's (2), Meconium plug syndrome (1), Jaundice (2), Trisomy 21 (1), GORD (2)                                                                                                                                                                                                                                                                                                                                                                                                                                           | O2 (3), Colostomy care (2), Daily bowel washouts (1)                                                                                                                            | 6-238d (10), Md 49d                 | 3-15mo, Md 8mo                           | 9                   | 9 (100)    | 27-42 (9), Md 34                          | N/A                             | NICU hospitalization                                                                                         |                                                      |
| Norton          | 2021 | 8                  | 3 (37.5%)    | 0-2y                                                       | PREM (8), not specified per child                                                                                                                                                                                                                                                                                                                                                                                                                                                                                                                                    | Nasogastric feeding tube (25%), gastric feeding tube (37.5%), supplemental oxygen via nasal tube (62.5%)                                                                        | 112d (60-160)                       | <2y                                      | 8                   | 8 (100)    | 35 (26-42)                                | 2 (25)                          |                                                                                                              |                                                      |
| Okido           | 2012 | 1                  | 0            | 48 (1)                                                     | Unspecified encephalopathy of unclear cause (1)                                                                                                                                                                                                                                                                                                                                                                                                                                                                                                                      | G-tube (1), Metallic trach (1)                                                                                                                                                  | 6 months (1)                        | + 3y                                     | 1                   | 1 (100)    | 37 (1)                                    | 1 (100)                         | Rehospitalized several times due to pneumonia 2y later                                                       |                                                      |
| Okido           | 2015 | 12                 | N/A          | <144 (12)                                                  | N/A                                                                                                                                                                                                                                                                                                                                                                                                                                                                                                                                                                  | G-tube or GI-tube (11), Trach, non-invasive mechanical ventilation, or O2 therapy (7), Urinary relief catheter, or intestinal washing (3)                                       | N/A                                 | N/A                                      | 12                  | 12 (100)   | Mn 34                                     | 12 (100)                        |                                                                                                              |                                                      |
| Silva-Rodrigues | 2019 | 11                 | N/A          | 24-204 (11)                                                | ALL (11)                                                                                                                                                                                                                                                                                                                                                                                                                                                                                                                                                             | N/A                                                                                                                                                                             | N/A                                 | N/A                                      | 11                  | 9 (82)     | 29-48 (11), Md 37                         | 11 (100)                        | Children in the induction period of oncological treatment. Parents already provided home care to their child |                                                      |
| Simeone         | 2018 | N/A                | N/A          | N/A                                                        | CHD (24)                                                                                                                                                                                                                                                                                                                                                                                                                                                                                                                                                             | Device the Deans (1)                                                                                                                                                            | 3-120d, Mn 37d, SD 25.39            | 1-3mo <sup>n</sup>                       | 24                  | 18 (75)    | 18-49 (24), Mn 37.18 SD 8.976             | 12 (50)                         |                                                                                                              |                                                      |
| Zanello         | 2015 | 17 <sup>f</sup>    | 9 (53)       | 3-68 (17), Md 9.1                                          | PREM <1000 gr (9), Encephalopathy (5), Hydrocephalus (1), Myopathy (1), CM (1)                                                                                                                                                                                                                                                                                                                                                                                                                                                                                       | N/A                                                                                                                                                                             | N/A                                 | 0.7-8.3w, Mn 3.8 SD 2.4; Md 3.5          | 23                  | 15 (65)    | N/A                                       | N/A                             |                                                                                                              |                                                      |

y: Years; mo: Months; w: Weeks; d: Days; Md: Median; Mn: Mean; SD: Standard Deviation; ALL: Acute lymphoblastic leukemia; BM: Bronchomalacia; BPD: Bronchopulmonary dysplasia; Ca: Cancer; CH: Cerebellar hypoplasia; CHD: Congenital heart disease; CHS: Congenital hypoventilation syndrome; CLD: Chronic lung disease; CM: Congenital Malformations; CMG: Congenital myasthenia gravis; COA: Coarctation of Aorta; CP: Cerebral palsy; CPAP: Continuous Positive Airway Pressure; CR: Cortical visual impairment; CV: Cardiovascular; CVI: Cortical visual impairment; CVL: Central venous line; DAA: Double aortic arch; DD: Developmental delay; DH: Diaphragmatic hernia; EA: Esophageal Atresia; EP: Epilepsy; ET: Esotropia; G-tube: Gastrostomy tube; GI: Gastrointestinal; GI-tube: Gastrojejunostomy tube; GORD: Gastro-oesophageal reflux disease; HEME: Hematologic; HLHS: Hypoplastic left heart syndrome; HP: Hemiplegia; HRHS: Hypoplastic right heart syndrome; HT: Hypertension; Imp. Anus: Imperforate Anus; IPD: Interstitial pulmonary disease; LFNC: Low-flow nasal cannula; MD: Motor delay; MEG: Megalencephaly; MET: Metabolic; NEB: Nebulizer; Neur: Neurological; NG-tube: Nasogastric tube; NICU: Neonatal intensive care unit; O2: Oxygen; OSA: Obstructive sleep apnea; PDA: Patent ductus arteriosus; PICU: Pediatric intensive care unit; PH: Pulmonary Hypoplasia; POX: Pulse oximeter; PREM: Prematurity; PRS: Pierre Robin syndrome; RA: Renal agenesis; RD: Renal dysplasia; RDS: Respiratory distress syndrome; RES: Respiratory; Sa: Saturation; SMA: Spinal muscular atrophy; SNHL: Sensorineural hearing loss; synd: Syndrome; TM: Tracheomalacia; TOF: Tetralogy of Fallot; Trach: Tracheostomy; VP shunt: Ventriculoperitoneal shunt; VUR: Vesicoureteral reflux; A: Including twins; B: including 2twins, 1triplets; C: (including one child that dropped out because they deceased); D: including twins; E: 16 families; F: Median gestational age 31 weeks (range 24-42); G: Pediatric medical complexity algorithm (PMCA) category; H: Average age at data collection was 34 months; I: Inserted tracheostomy tube over the past 2 years; J: And before discharge; K: And before and after stage 2 surgery; L: During hospitalization (in pinnphase 1 to 2 weeks after hospitalization); M: time of therapy varied from 21 to 75 days; N: just returned home from hospital after undergoing cardiac surgery; O: Including 1 foster parent; X: Could be more than 1 per individual
