# Supplementary material for: Delineating family needs in the transition from hospital to home for children with medical complexity: part 1, a meta-aggregation of qualitative studies
Source: Orphanet J Rare Dis. 2023 Dec 12;18:386. doi: 10.1186/s13023-023-02942-9 (PMC10714518; doi:10.1186/s13023-023-02942-9)
Supplement: Supplementary file 4 — Additional file 4: Table S3. Synthesized findings represented throughout the included papers. [file 13023_2023_2942_MOESM4_ESM.pdf]

**Additional file 4 – Table 3: Synthesized findings represented throughout the included papers**

[illegible]
